# Supplementary material for: Nature-Inspired 1-Phenylpyrrolo[2,1-a]isoquinoline Scaffold for Novel Antiproliferative Agents Circumventing P-Glycoprotein-Dependent Multidrug Resistance
Source: MDPI journal article supplement (doi:10.3390/ph17040539), 2024-04-22
Supplement: s1 [file s1]

## Supporting Information

### Nature-inspired 1-phenylpyrrolo[2,1-*a*]isoquinoline scaffold for novel antiproliferative agents circumventing P-glycoprotein-dependent multidrug resistance

Alisa A. Nevskaya <sup>1a</sup>, Rosa Purgatorio <sup>2</sup>, Tatiana Borisova <sup>1a</sup>, Alexey V. Varlamov <sup>1a</sup>, Lada V. Anikina <sup>3</sup>, Arina Obydennik <sup>1a</sup>, Elena Yu. Nevskaya <sup>1b</sup>, Mauro Niso <sup>2</sup>, Nicola A. Colabufo<sup>2</sup>, Antonio Carrieri <sup>2</sup>, Marco Catto <sup>2</sup>, Modesto de Candia <sup>2</sup>, Leonid G. Voskressensky <sup>1a</sup> and Cosimo D. Altomare <sup>2\*</sup>

- <sup>1</sup> <sup>a</sup>Organic Chemistry Department, <sup>b</sup> General and Inorganic Chemistry Department, Peoples' Friendship University of Russia (RUDN University), 6 Miklukho-Maklaya St., 117198 Moscow, Russian Federation
- <sup>2</sup> Department of Pharmacy-Pharmaceutical Sciences, University of Bari Aldo Moro, Via E. Orabona 4, 70125 Bari, Italy
- <sup>3</sup> Institute of Physiologically Active Compounds of the FSBIS of the Federal Research Center for Problems of Chemical Physics and Medicinal Chemistry of the RAS, 1 Severnyi Proezd, 142432 Chernogolovka, Russian Federation
- \* Correspondence: [cosimodamiano.altomare@uniba.it](mailto:cosimodamiano.altomare@uniba.it)

#### Table of content

|                                                         |            |         |
|---------------------------------------------------------|------------|---------|
| <sup>1</sup> H and <sup>13</sup> C-NMR of <b>4b</b>     | Figure S1  | Page 2  |
| <sup>1</sup> H and <sup>13</sup> C-NMR of <b>5a</b>     | Figure S2  | Page 3  |
| <sup>1</sup> H and <sup>13</sup> C-NMR of <b>5c</b>     | Figure S3  | Page 4  |
| <sup>1</sup> H and <sup>13</sup> C-NMR of <b>6d</b>     | Figure S4  | Page 5  |
| <sup>1</sup> H and <sup>13</sup> C-NMR of <b>6e</b>     | Figure S5  | Page 6  |
| <sup>1</sup> H and <sup>13</sup> C-NMR of <b>7c</b>     | Figure S6  | Page 7  |
| <sup>1</sup> H and <sup>13</sup> C-NMR of <b>8b</b>     | Figure S7  | Page 8  |
| <sup>1</sup> H and <sup>13</sup> C-NMR of <b>8c</b>     | Figure S8  | Page 9  |
| <sup>1</sup> H and <sup>13</sup> C-NMR of <b>8c·HCl</b> | Figure S9  | Page 10 |
| P-gp inhibition potency <i>vs</i> FEB                   | Figure S10 | Page 11 |
| Squared correlation matrix among parameters             | Table S1   | Page 11 |

**Figure S1:**  $^1\text{H}$  and  $^{13}\text{C}$ -NMR of (1-(4-methoxyphenyl)-8,9-dimethoxy -5,6- dihydropyrrolo[2,1-*a*]isoquinoline -2- carbaldehyde (**4b**)

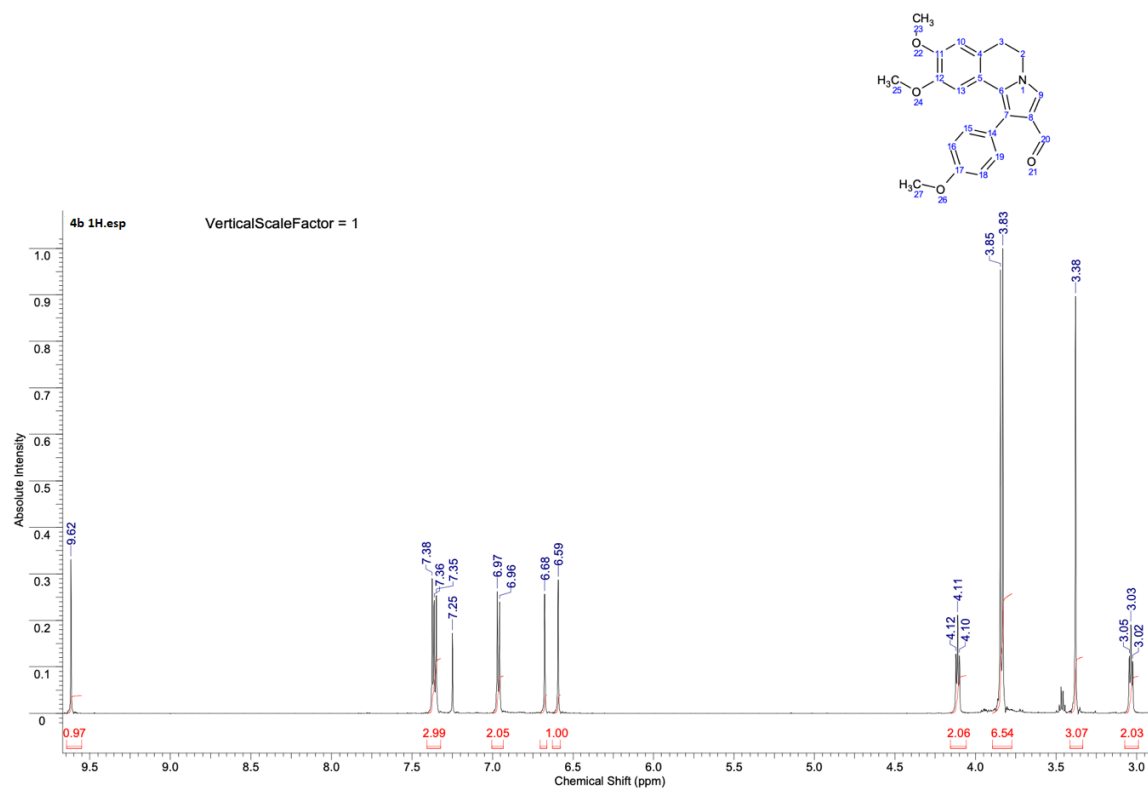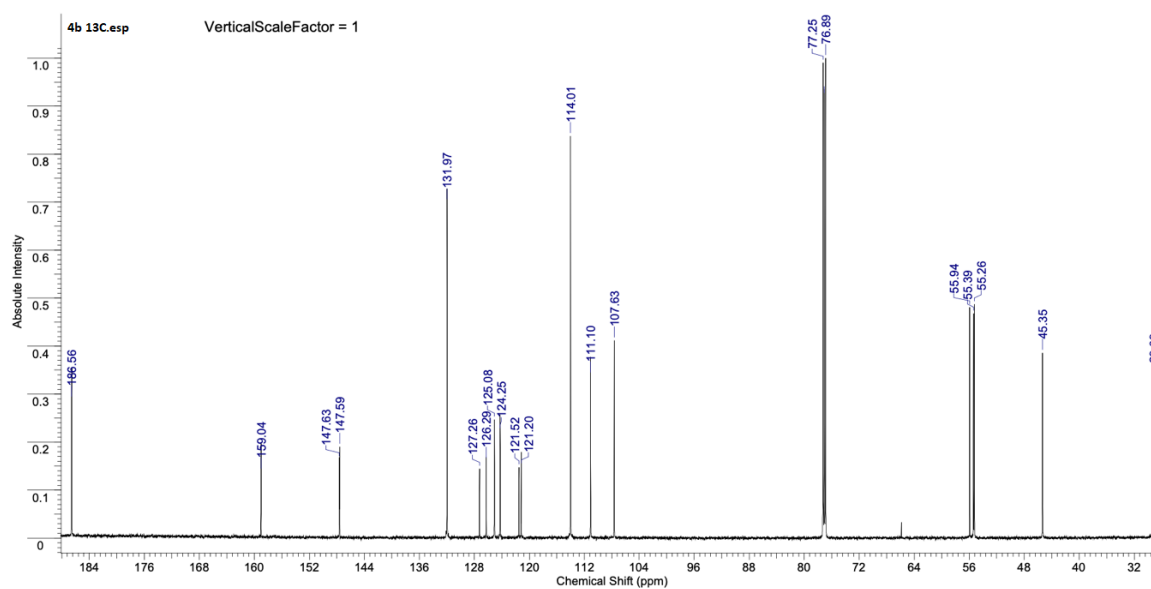

**Figure S2:**  $^1\text{H}$  and  $^{13}\text{C}$ -NMR of 1-(4-chlorophenyl)-8,9-dimethoxy-5,6-dihydropyrrolo[2,1-*a*]isoquinoline-2-carboxylic acid (**5a**)

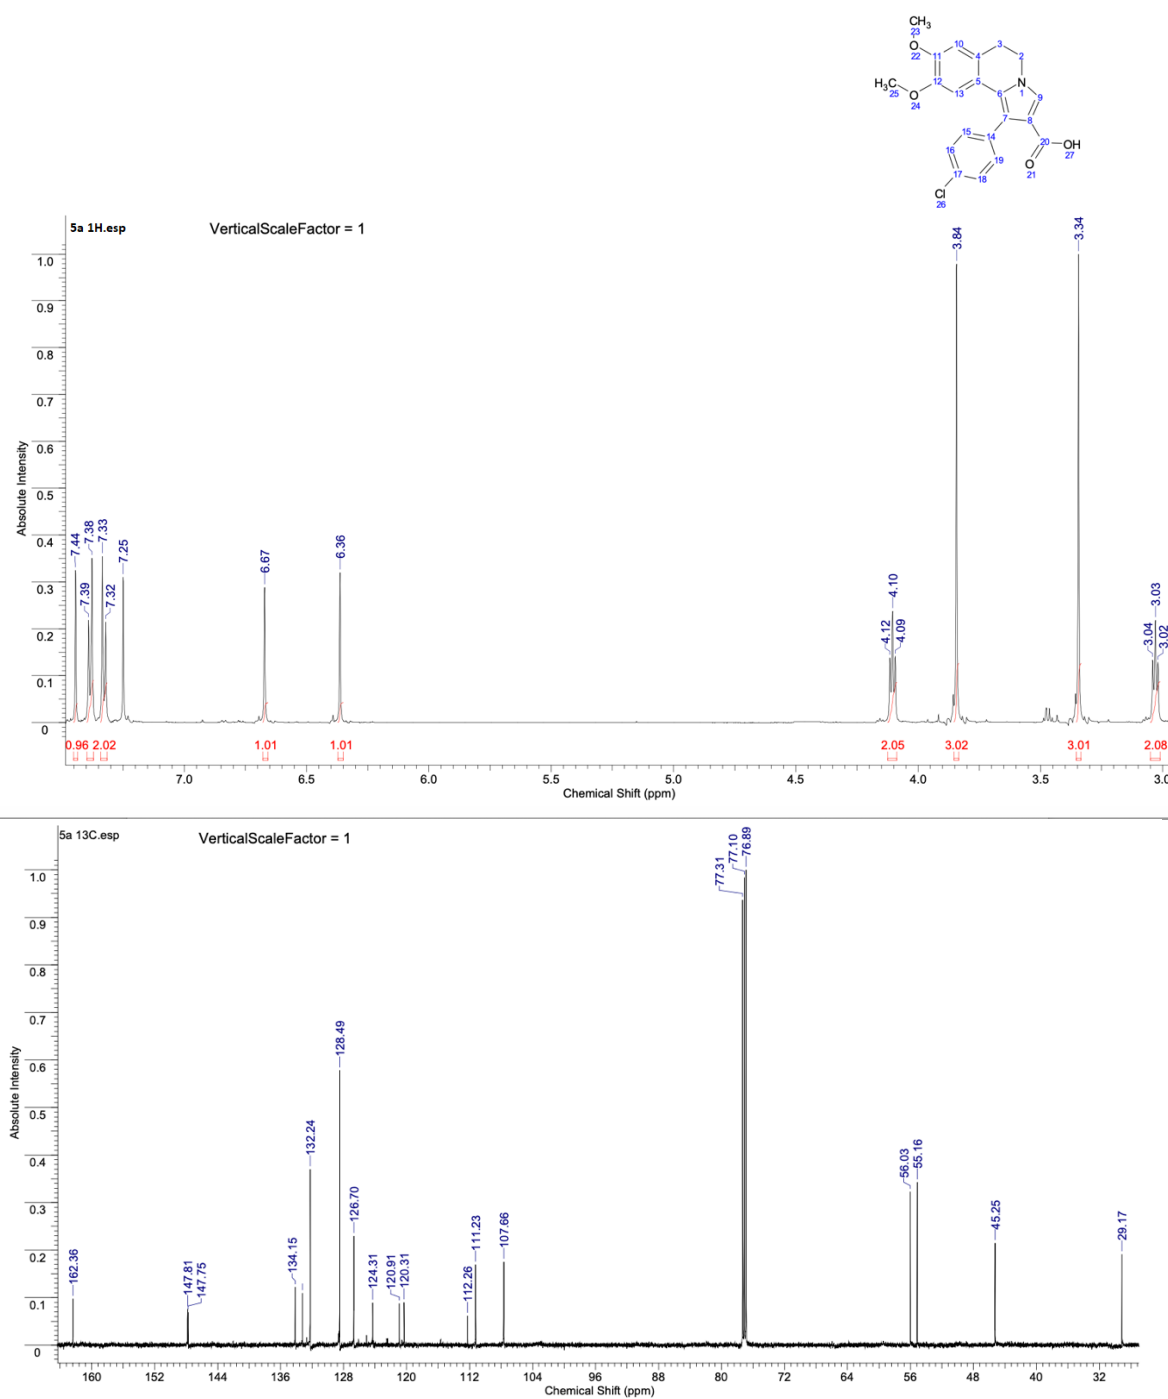

**Figure S3:**  $^1\text{H}$  and  $^{13}\text{C}$ -NMR of 1-(3,4-diethoxyphenyl)-8,9-diethoxy-5,6-dihydropyrrolo[2,1-*a*]isoquinoline-2-carboxylic acid (**5c**)

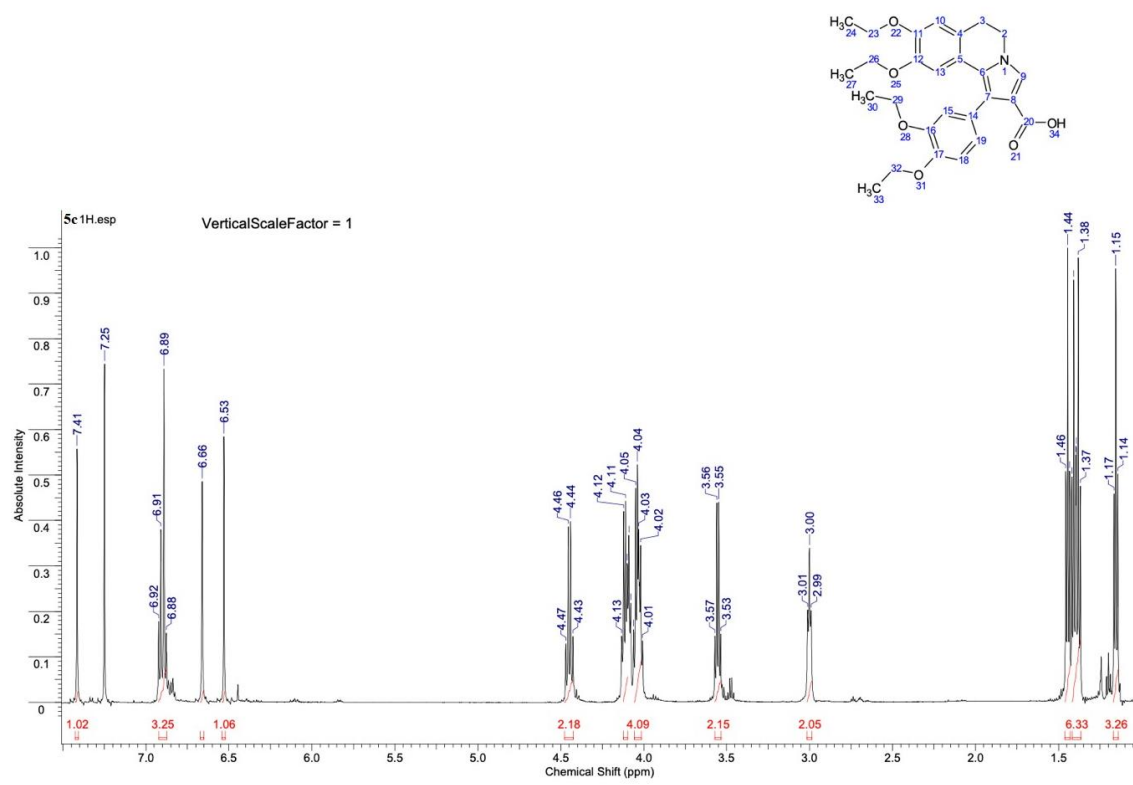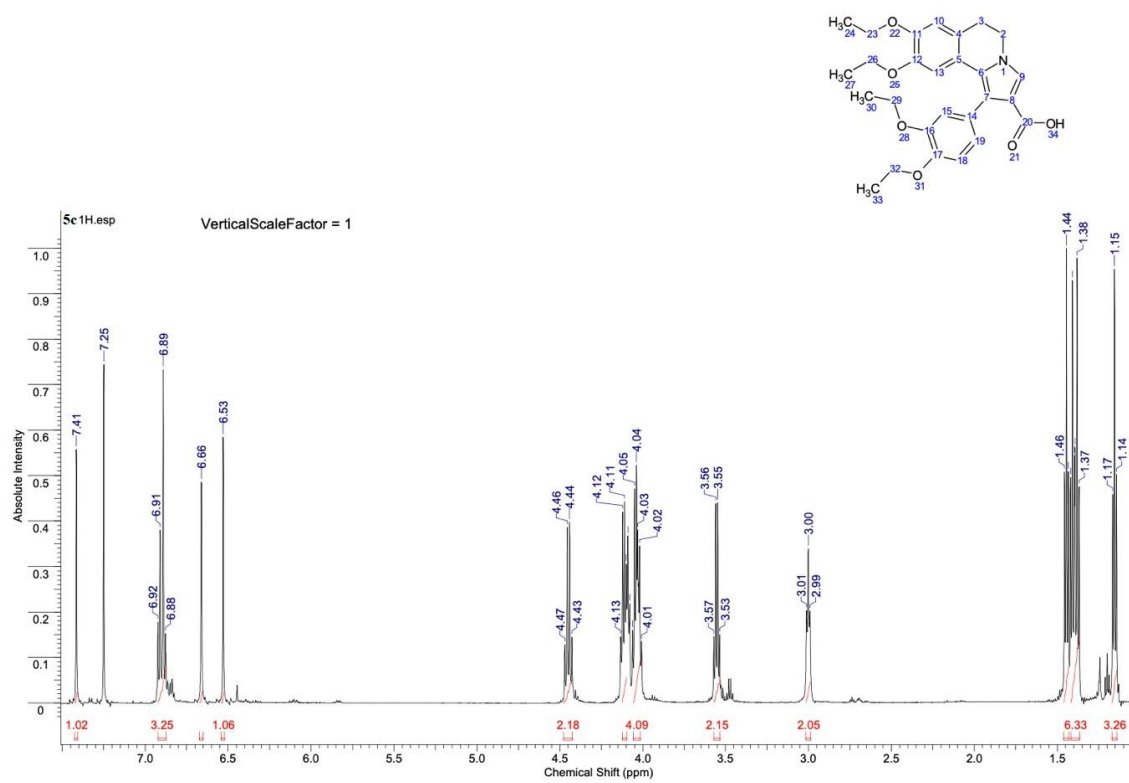

**Figure S4:**  $^1\text{H}$  and  $^{13}\text{C}$ -NMR of 1-(3,4-diethoxyphenyl)-8,9-diethoxy-3-methyl-5,6-dihydropyrrolo[2,1-*a*]isoquinoline-2-carbonitrile (**6d**)

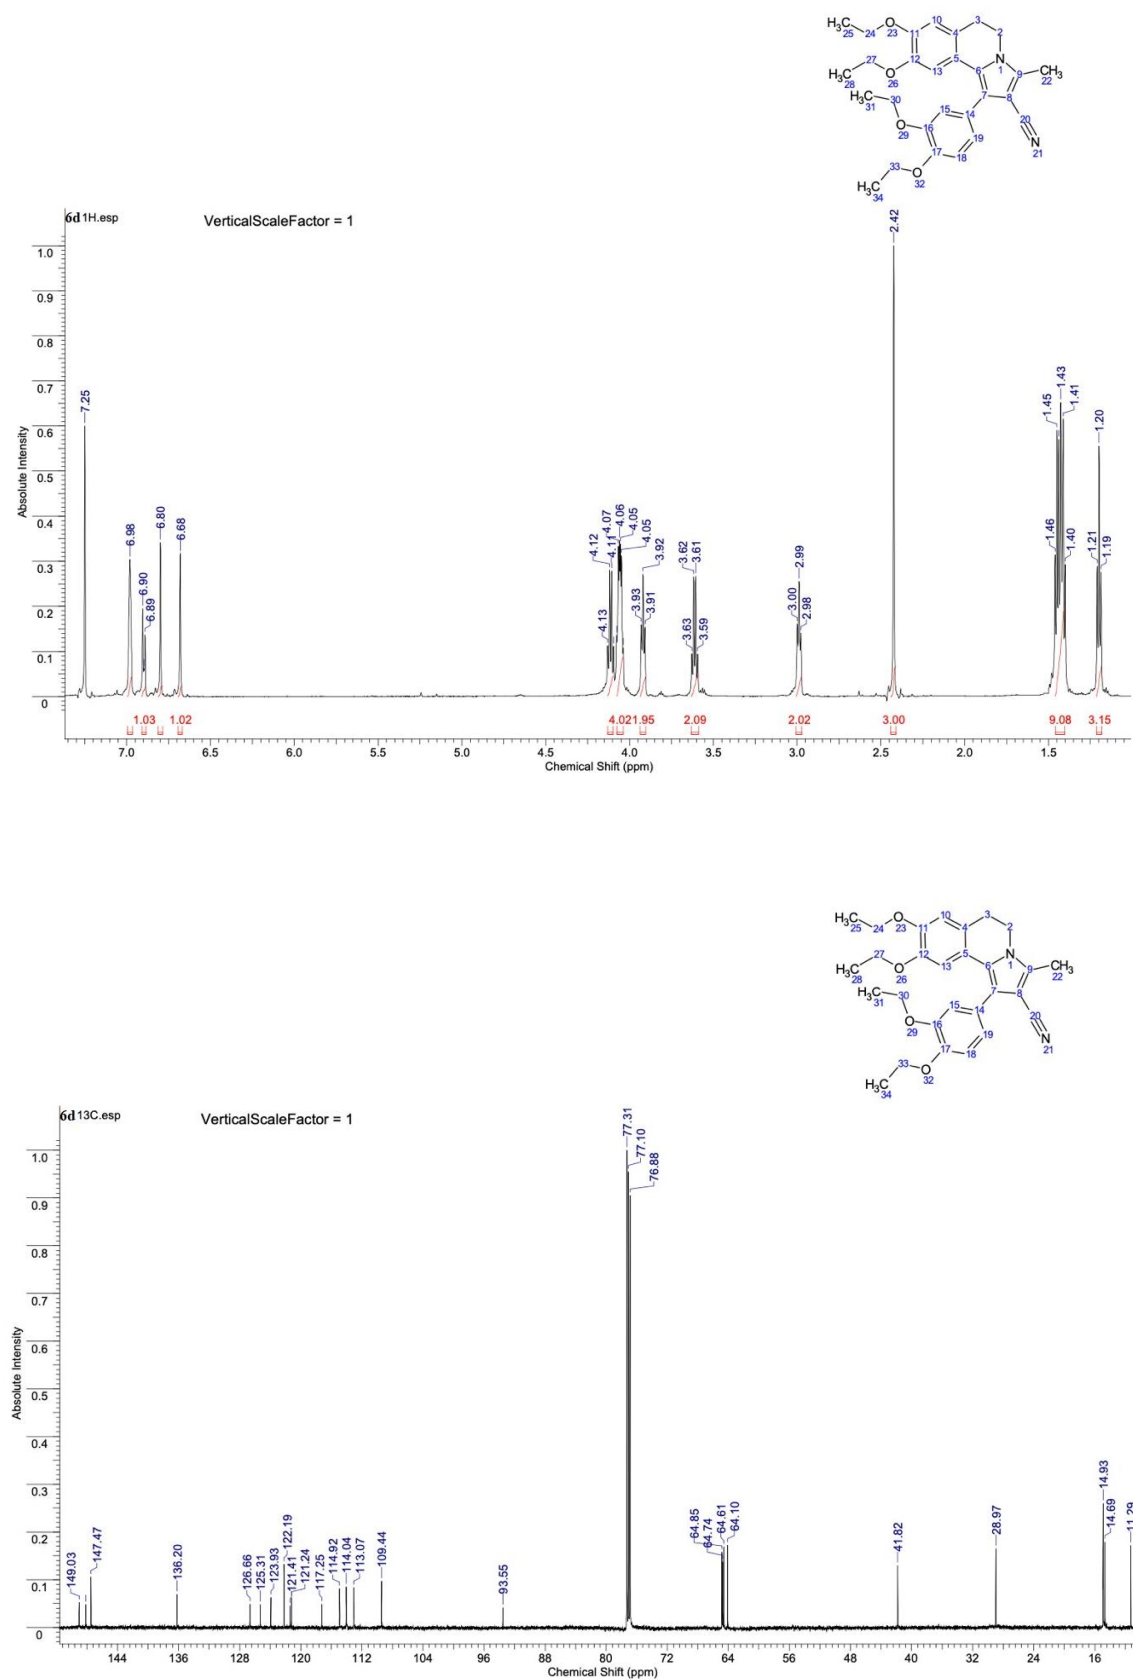

**Figure S5:**  $^1\text{H}$  and  $^{13}\text{C}$ -NMR of 1-(3,4-diethoxyphenyl)-8,9-diethoxy-3-phenyl-5,6-dihydropyrrolo[2,1-*a*]isoquinoline-2-carbonitrile (**6e**)

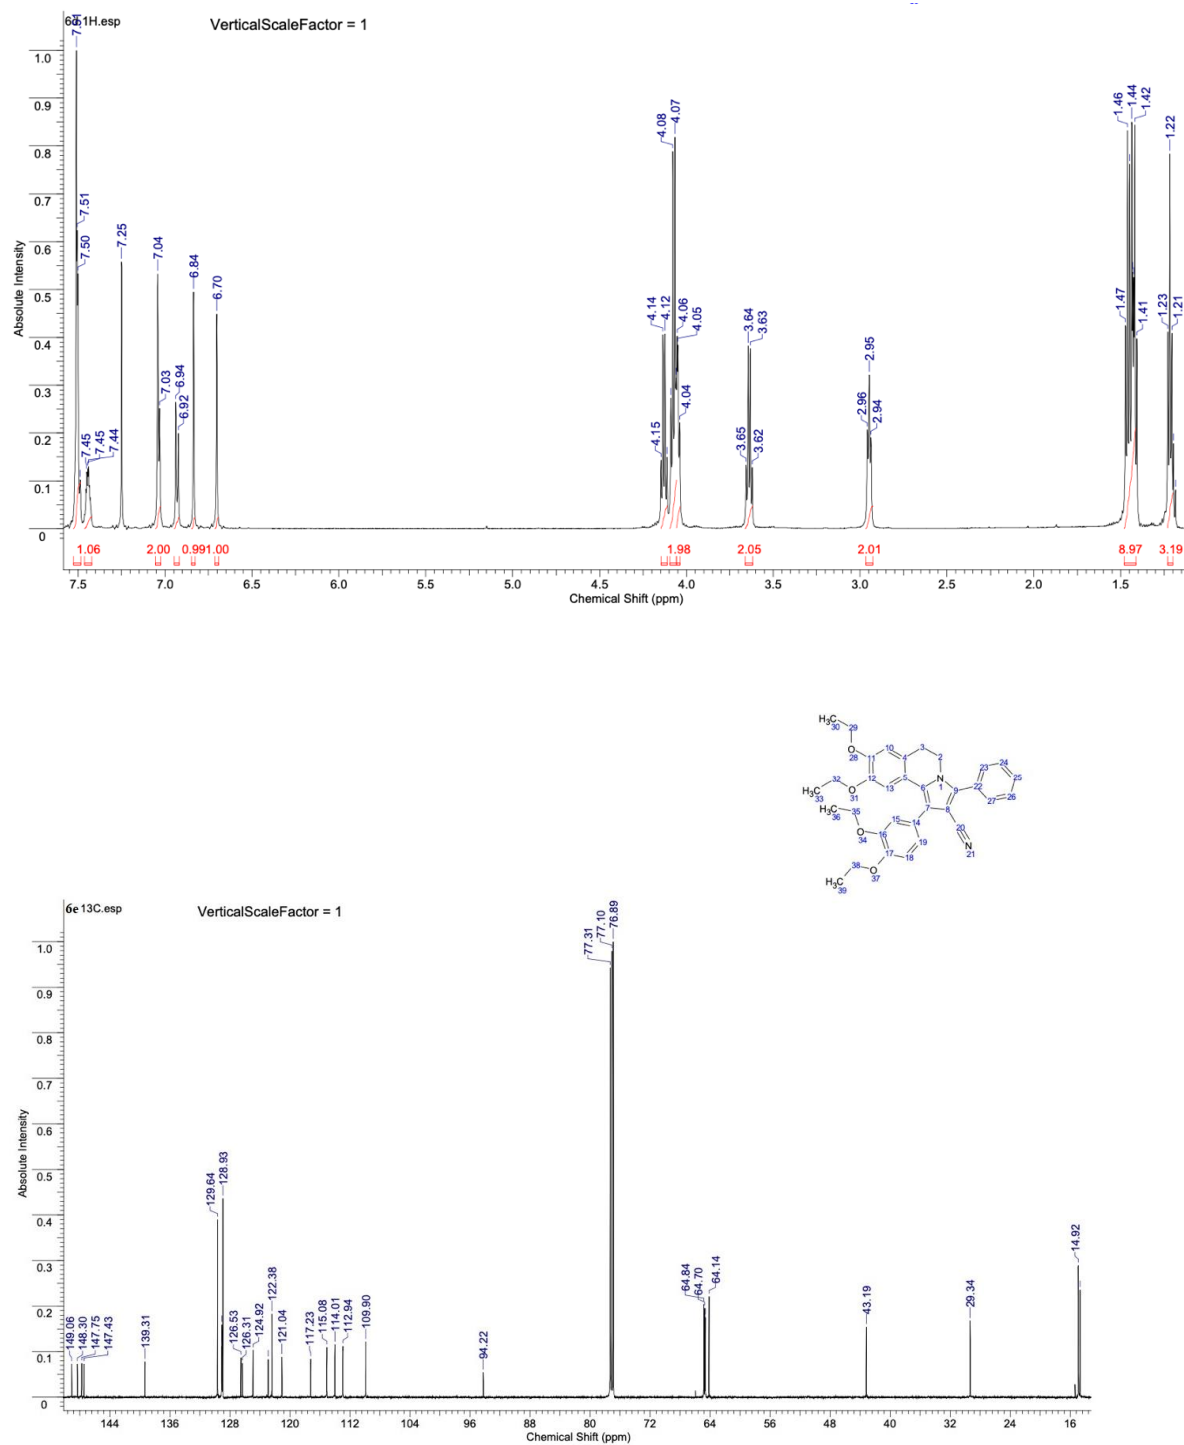

**Figure S6:**  $^1\text{H}$  and  $^{13}\text{C}$ -NMR of ethyl 1-(3,4-diethoxyphenyl)-8,9-diethoxy-5,6-dihydro pyrrolo[2,1-*a*]isoquinoline-2-carboxylate (**7c**)

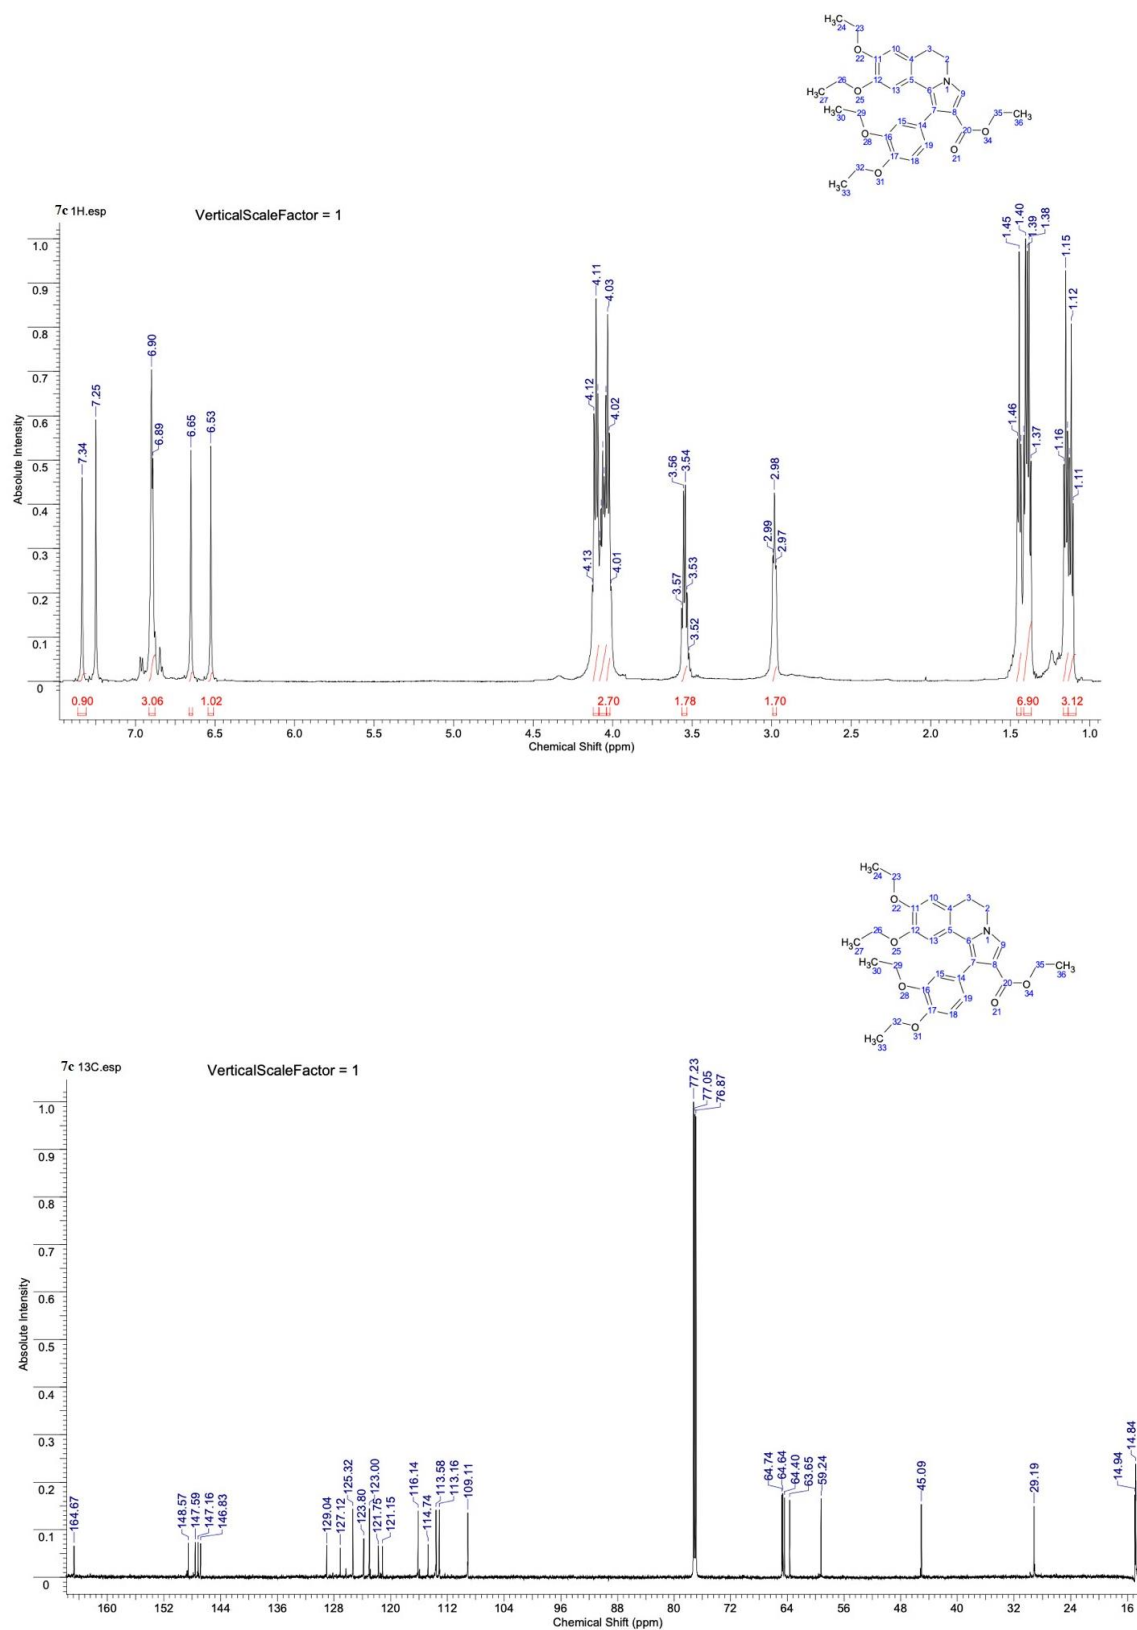

**Figure S7:**  $^1\text{H}$  and  $^{13}\text{C}$ -NMR of 8,9-dimethoxy-1-(4-methoxyphenyl)-2-(morpholin-4-ylmethyl)-5,6-dihydropyrrolo[2,1-*a*]isoquinoline (**8b**)

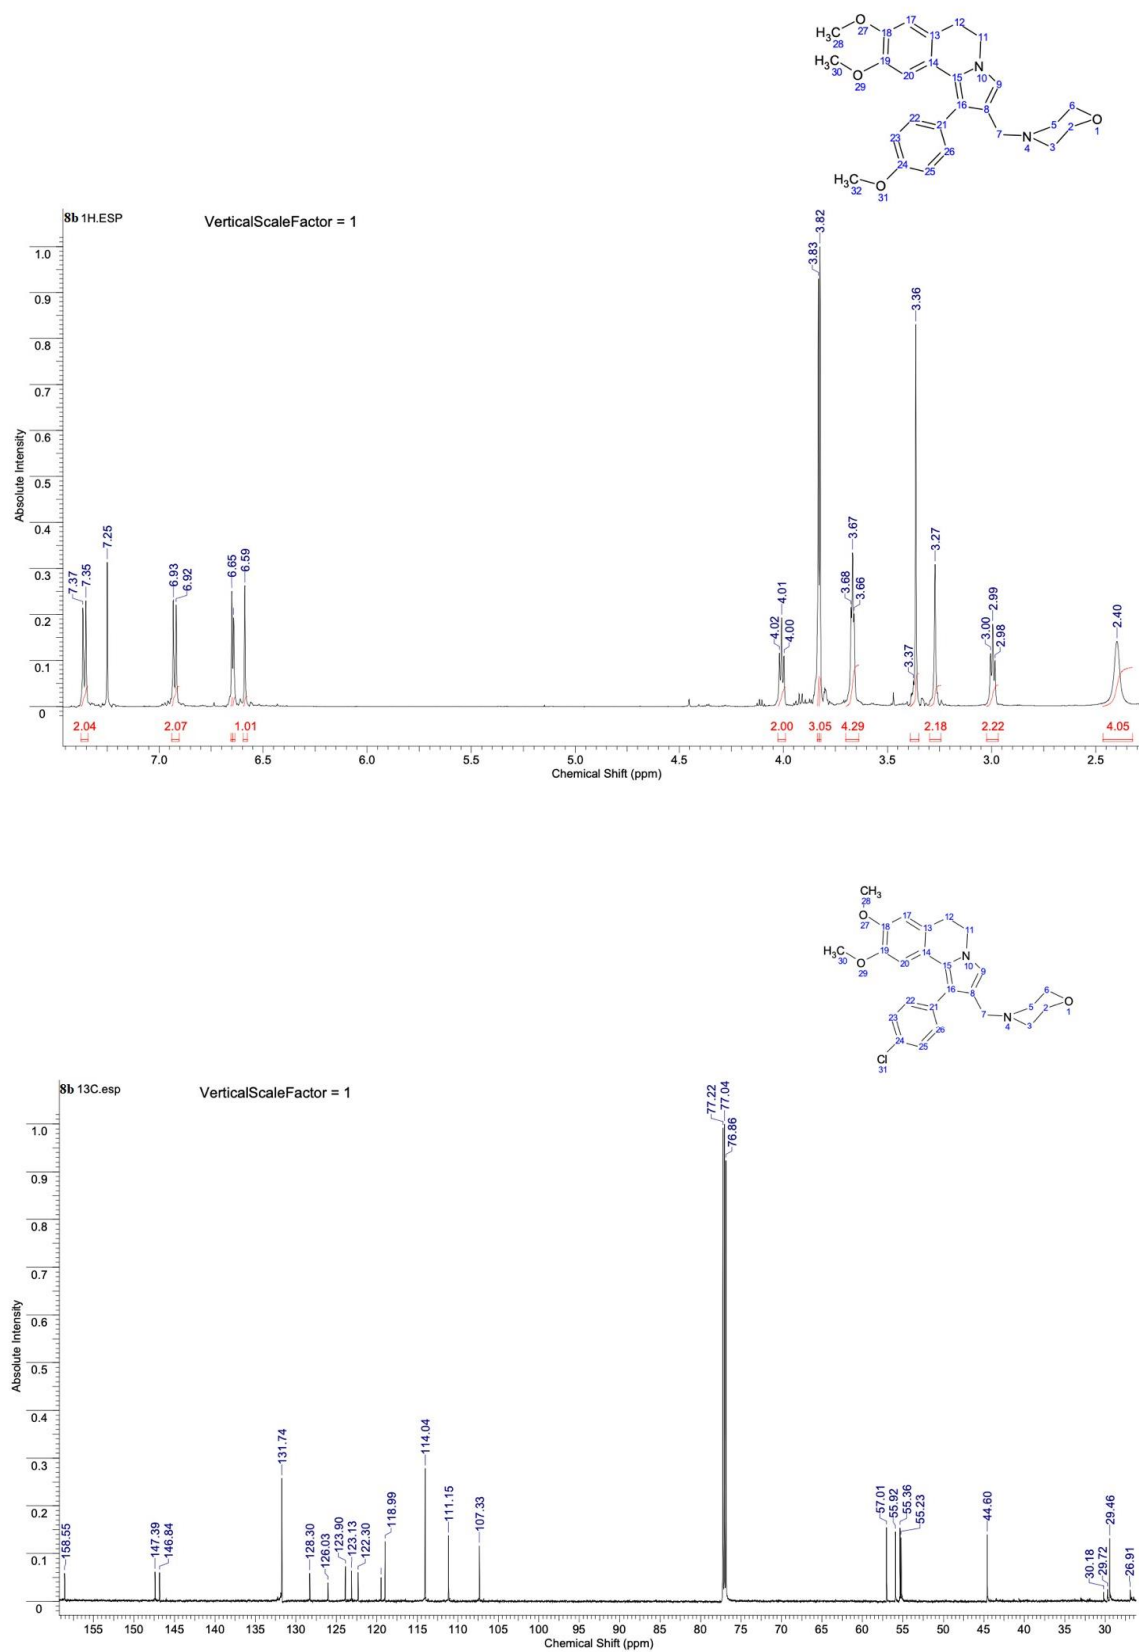



**Figure S8:**  $^1\text{H}$  and  $^{13}\text{C}$ -NMR of 1-(3,4-diethoxyphenyl)-8,9-diethoxy-2-(morpholin-4-ylmethyl)-5,6-dihydropyrrolo[2,1-*a*]isoquinoline (**8c**)

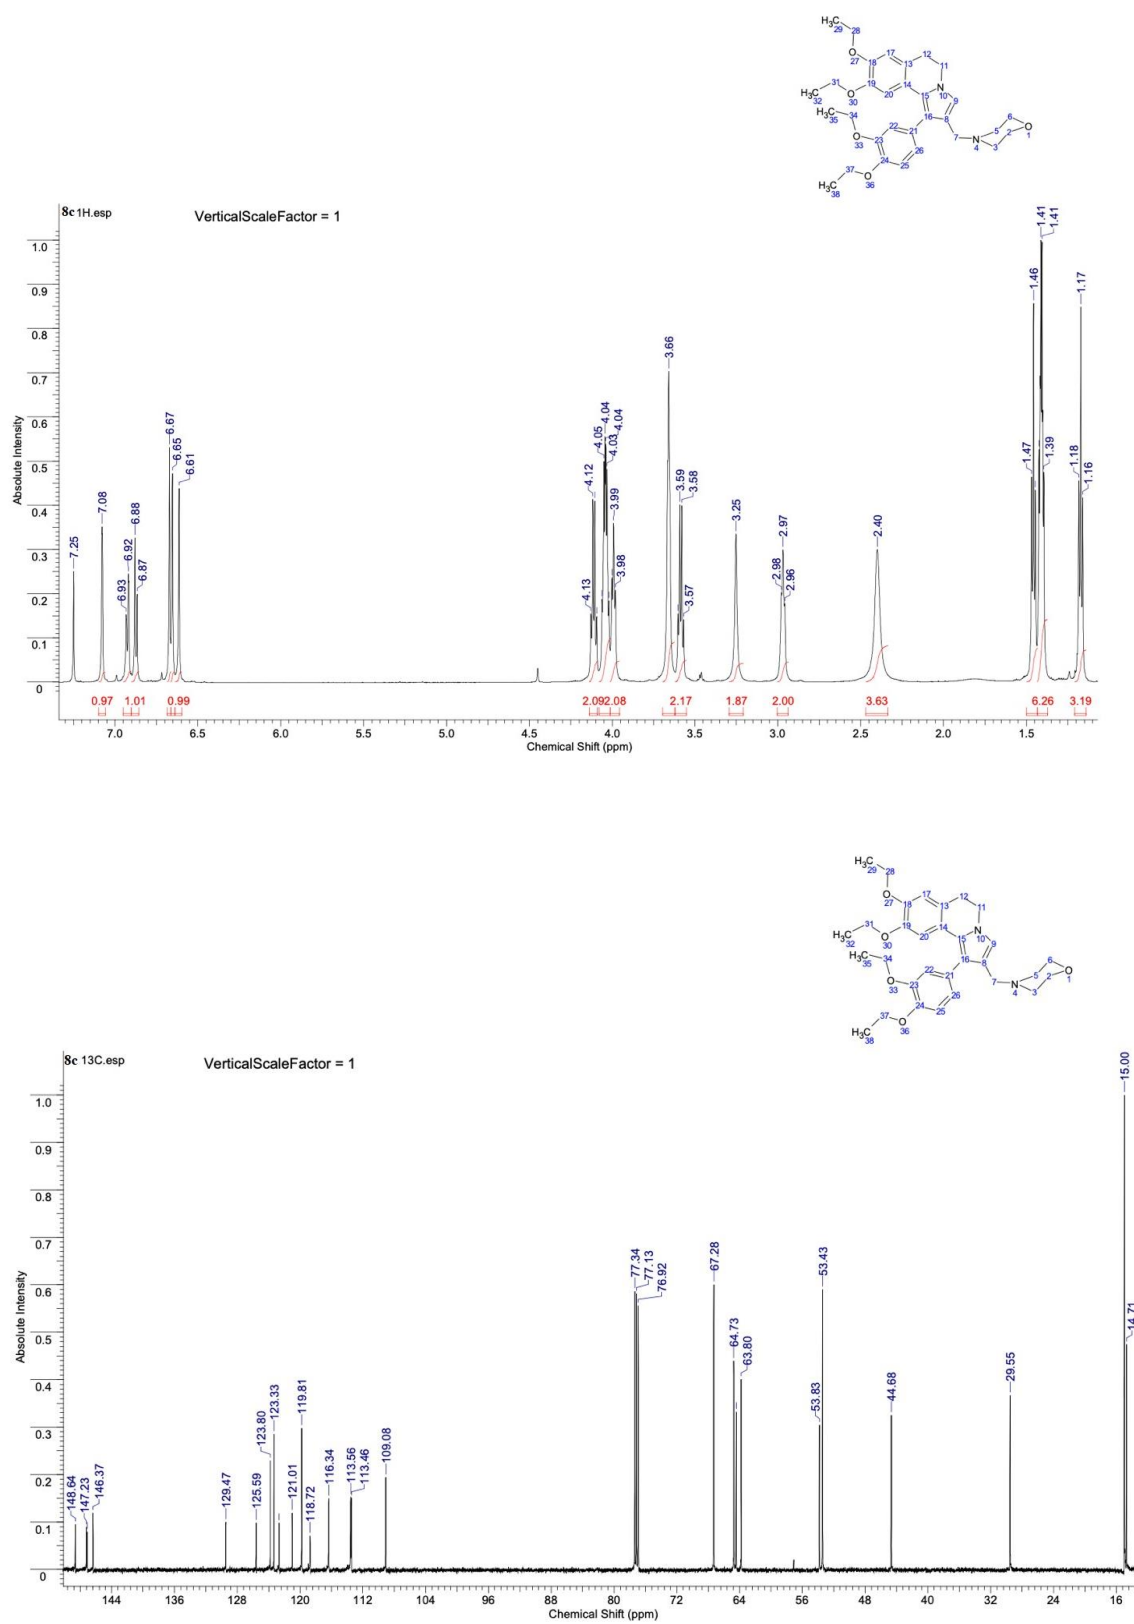

**Figure S9:**  $^1\text{H}$  and  $^{13}\text{C}$ -NMR of 4-[[1-(3,4-diethoxyphenyl)-8,9-diethoxy-5,6-dihydropyrrolo[2,1-*a*]isoquinolin-2-yl]methyl]morpholin-4-ium chloride (**8c·HCl**)

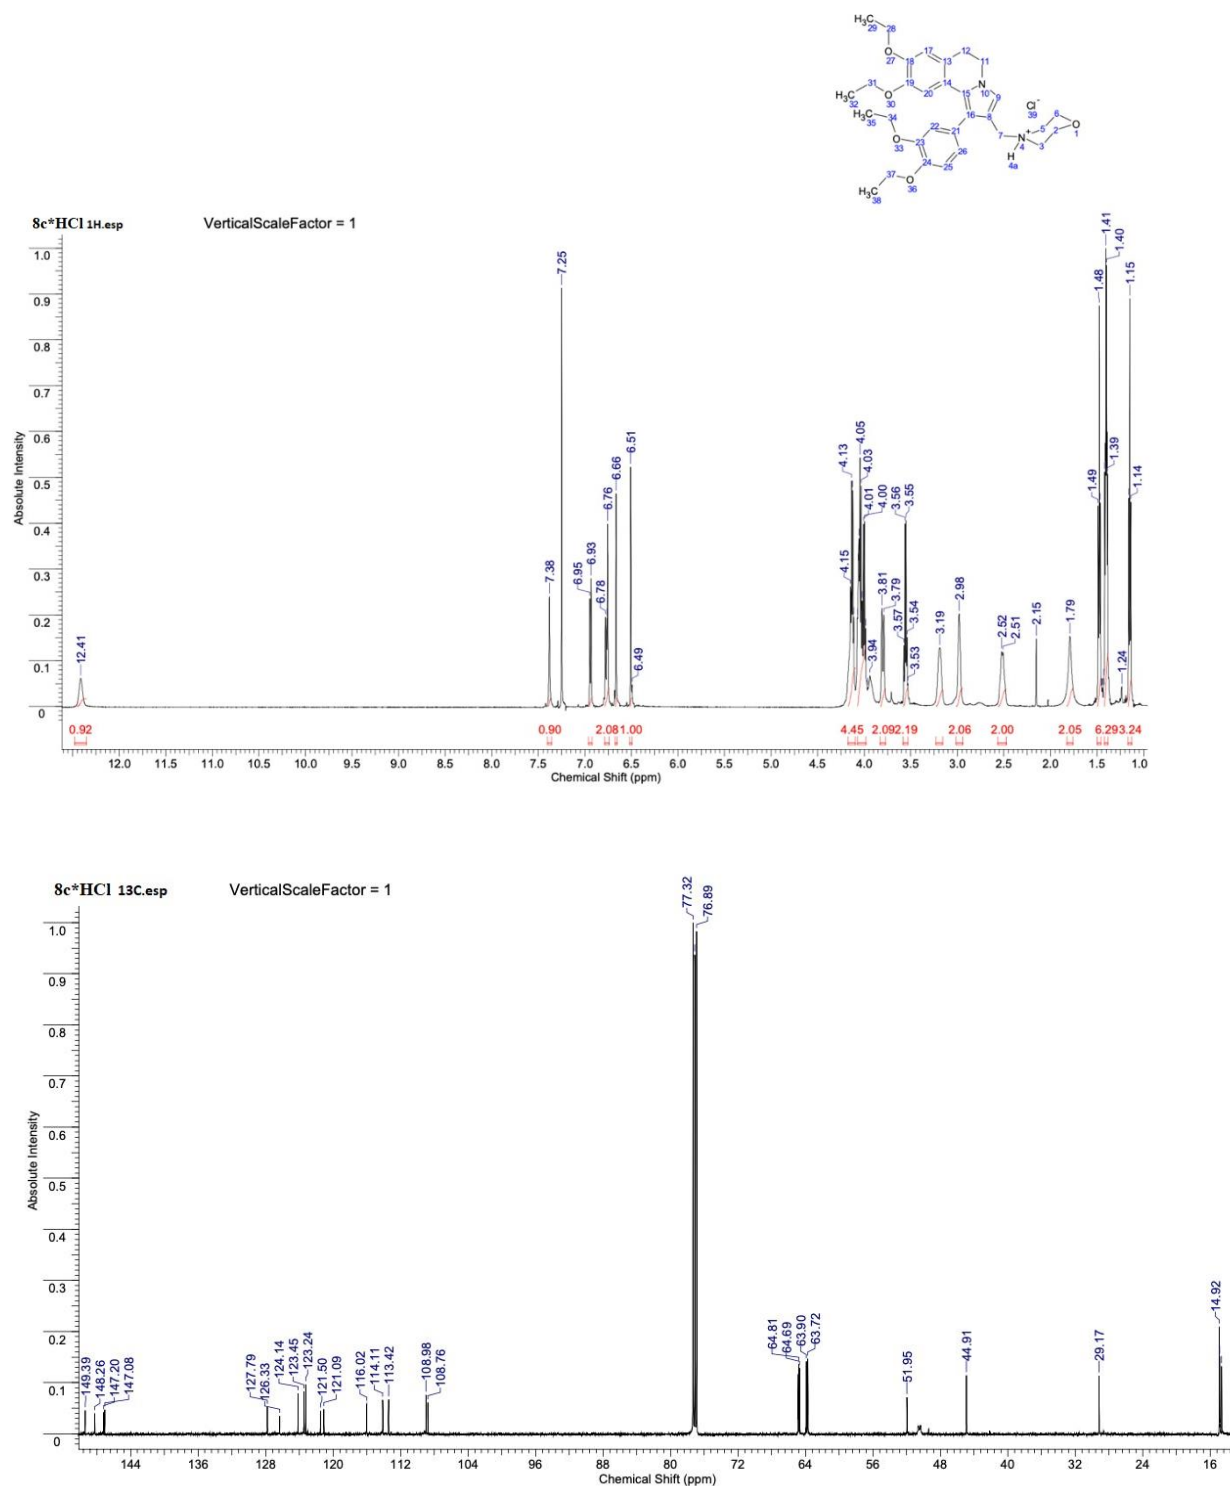

**Figure S10.** Plot of the P-gp inhibition potency ( $-\log \text{IC}_{50}$ ) versus free energy of binding (FEB,  $\text{kcal}\cdot\text{mol}^{-1}$ ); data are correlated through a trend of binomial nonlinear relationship ( $r^2 = 0.879$ ).

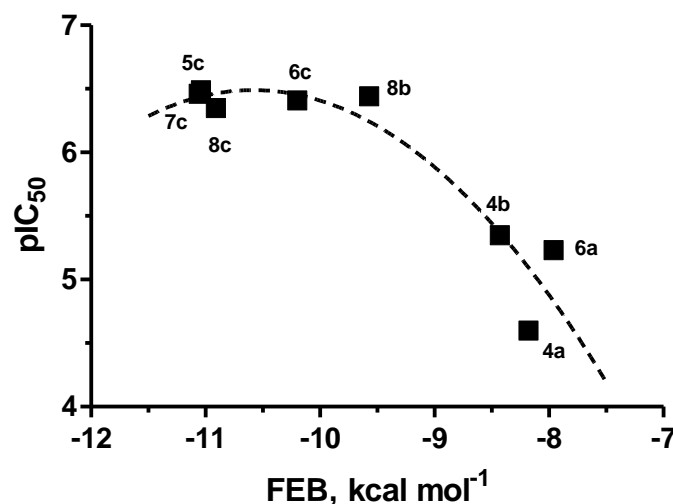

**Table S1.** Squared correlation matrix ( $r^2$ ) of the biochemical/biophysical data<sup>a</sup> and physicochemical parameters<sup>b</sup> listed in Table 2.

|                              | P-gp  | MRP1  | HSA   | log S | clog P | log $k'_w$ |
|------------------------------|-------|-------|-------|-------|--------|------------|
| <b>P-gp</b>                  | 1     |       |       |       |        |            |
| <b>MRP1</b>                  | 0.001 | 1     |       |       |        |            |
| <b>HSA</b>                   | 0.381 | 0.284 | 1     |       |        |            |
| <b>log S</b>                 | 0.147 | 0.502 | 0.497 | 1     |        |            |
| <b>clog P</b>                | 0.255 | 0.135 | 0.029 | 0.017 | 1      |            |
| <b>log <math>k'_w</math></b> | 0.237 | 0.272 | 0.003 | 0.041 | 0.791  | 1          |

<sup>a</sup> P-gp (P-glycoprotein) and MRP1 (multidrug-resistance-associated protein-1) inhibition potency data are expressed by  $-\log \text{IC}_{50}$  ( $\text{mol}\cdot\text{L}^{-1}$ ) values; for compounds showing  $\text{IC}_{50}\text{s} > 100 \mu\text{M}$  'truncated' values of  $-\log \text{IC}_{50}$  equal to 4.00 were used in correlation analysis. HSA (human serum albumin) binding affinity is expressed as  $\log_{10}$  of the equilibrium dissociation constant ( $K_D$ ,  $\text{mol}\cdot\text{L}^{-1}$ ) determined by a surface plasmon resonance (SPR) technique. <sup>b</sup> Log S is the  $\log_{10}$  of the compound solubility ( $\text{mol}\cdot\text{L}^{-1}$ ) in PBS (50 mM, pH 7.4, 0.15 M KCl) at  $25\pm 1^\circ\text{C}$ ; clog P is the 1-octanol/water partition coefficient calculated by ACDLabs software (release 10.0, Advanced Chemistry Development, Inc., Toronto, Canada); log  $k'_w$  is the  $\log_{10}$  of the polycratic capacity factor determined by a reversed phase (RP) HPLC technique.
